# Supplementary material for: Steering to intercept targets following curving trajectories: Insights into visual guidance from Qualitative Inconsistency Detection
Source: Research Square preprint supplement (doi:10.21203/rs.3.rs-1557142/v1), 2022-09-09

## Steering to intercept targets following curving trajectories: Insights into visual guidance from Qualitative Inconsistency Detection

Daphne van Opstal, Remy Casanova, Frank T.J.M. Zaal, and Reinoud J. Bootsma

**Supplementary Information Figure S1.** Page-size landscape-oriented enlargements of the four individual panels of main text Fig. 3, with **Fig. S1a** representing the S20/R20-OUT (rightward) trial of Participant 10 in Block 3, **Fig. S1b** representing the S20/R40-OUT (leftward) trial of Participant 11 in Block 3, **Fig. S1c** representing the S20/R40-IN (rightward) trial of Participant 7 in Block 3, and **Fig. S1d** representing the S10/R40-IN (leftward) trial of Participant 12 in Block 3.

### Figure Legend

*Left graph in each panel (page):* Spatial paths followed by the target (dotted grey line) and the participant (black line). Steering events are marked by colour-coded dots.

*Right graphs in each panel (page):* Time evolution (bottom to top) over the course of the trial of the participant's heading direction  $\phi$  (in green), the target-heading angle  $\beta$  (in red) and the target's bearing angle  $\theta$  (in blue) together with their first-order (dashed) and second-order (dash-dotted) time derivatives.

Horizontal grey lines situate the steering events spatially (left graph) and temporally (right graphs).

**a**

Target and participant paths

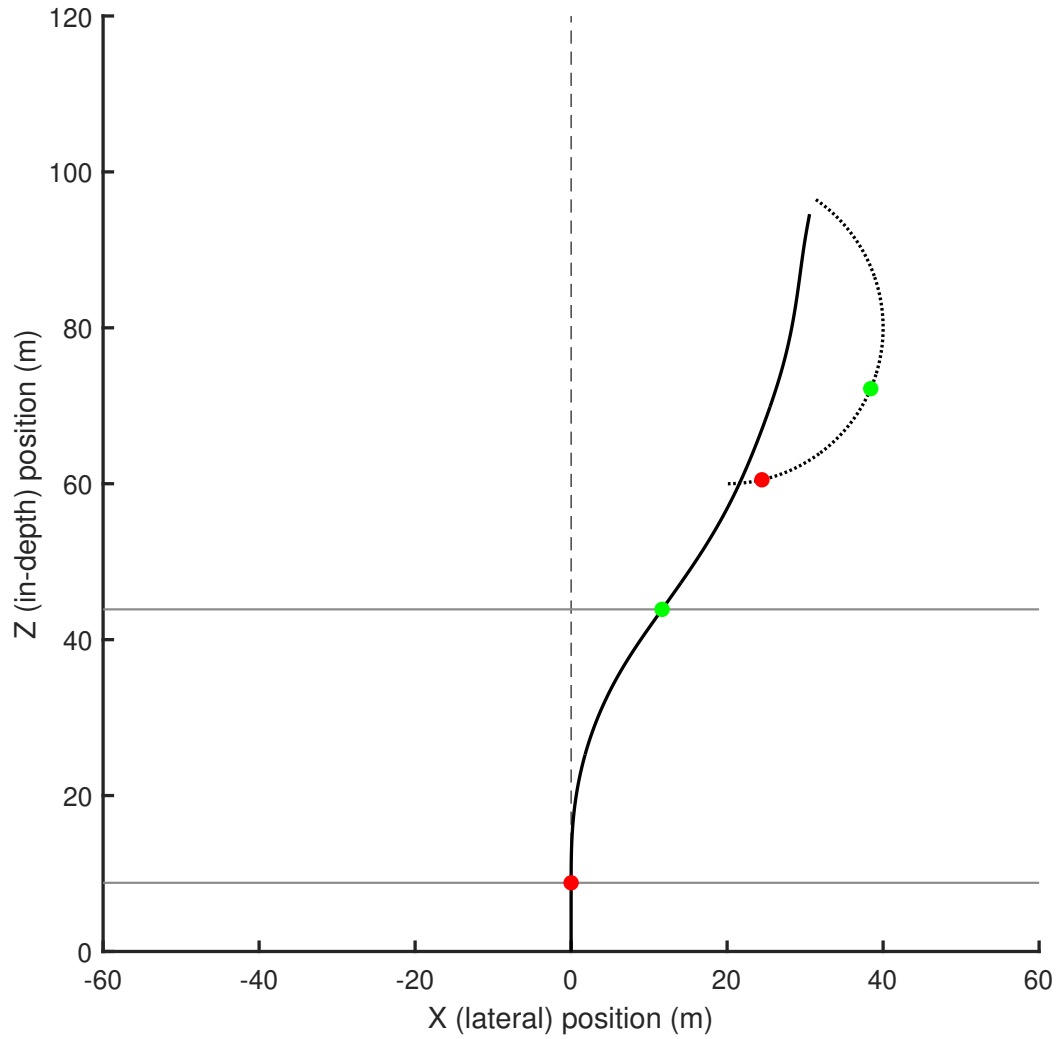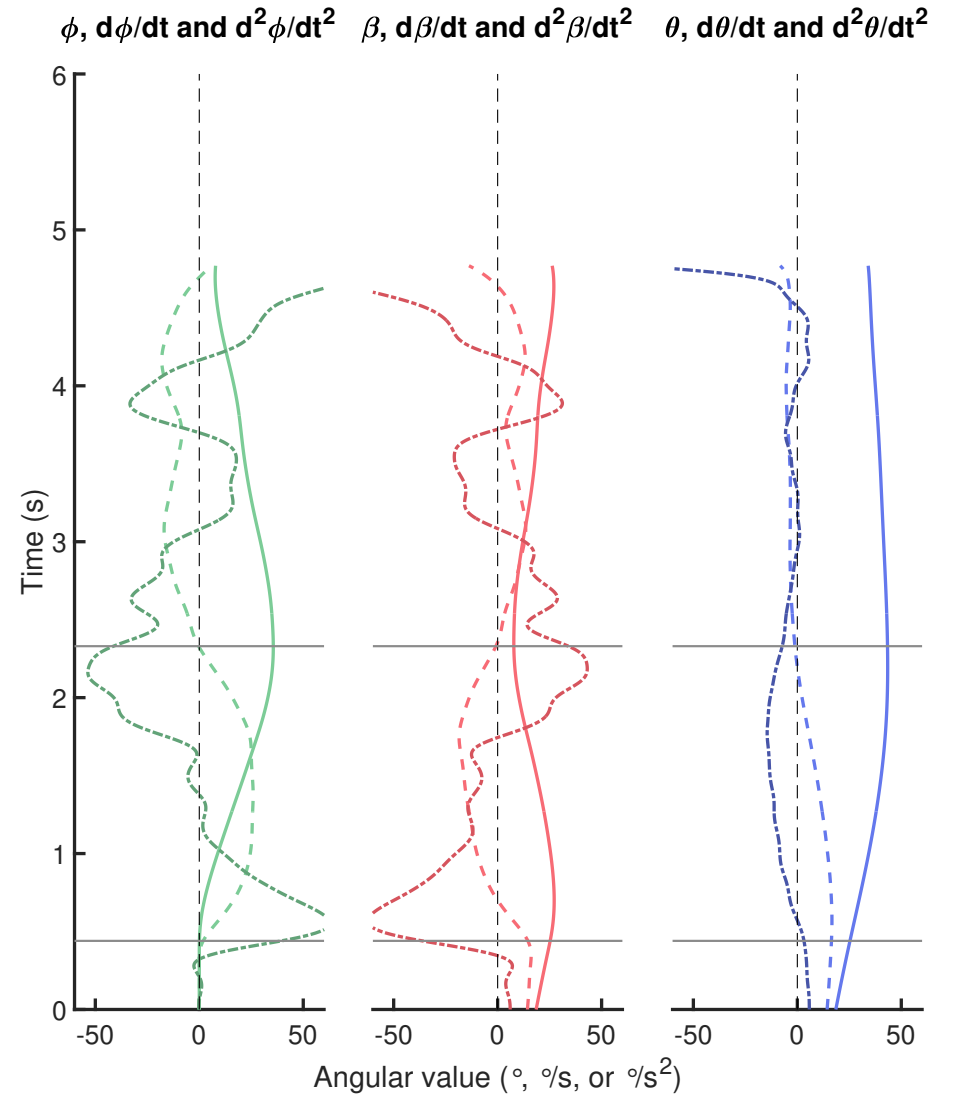

**b**

Target and participant paths

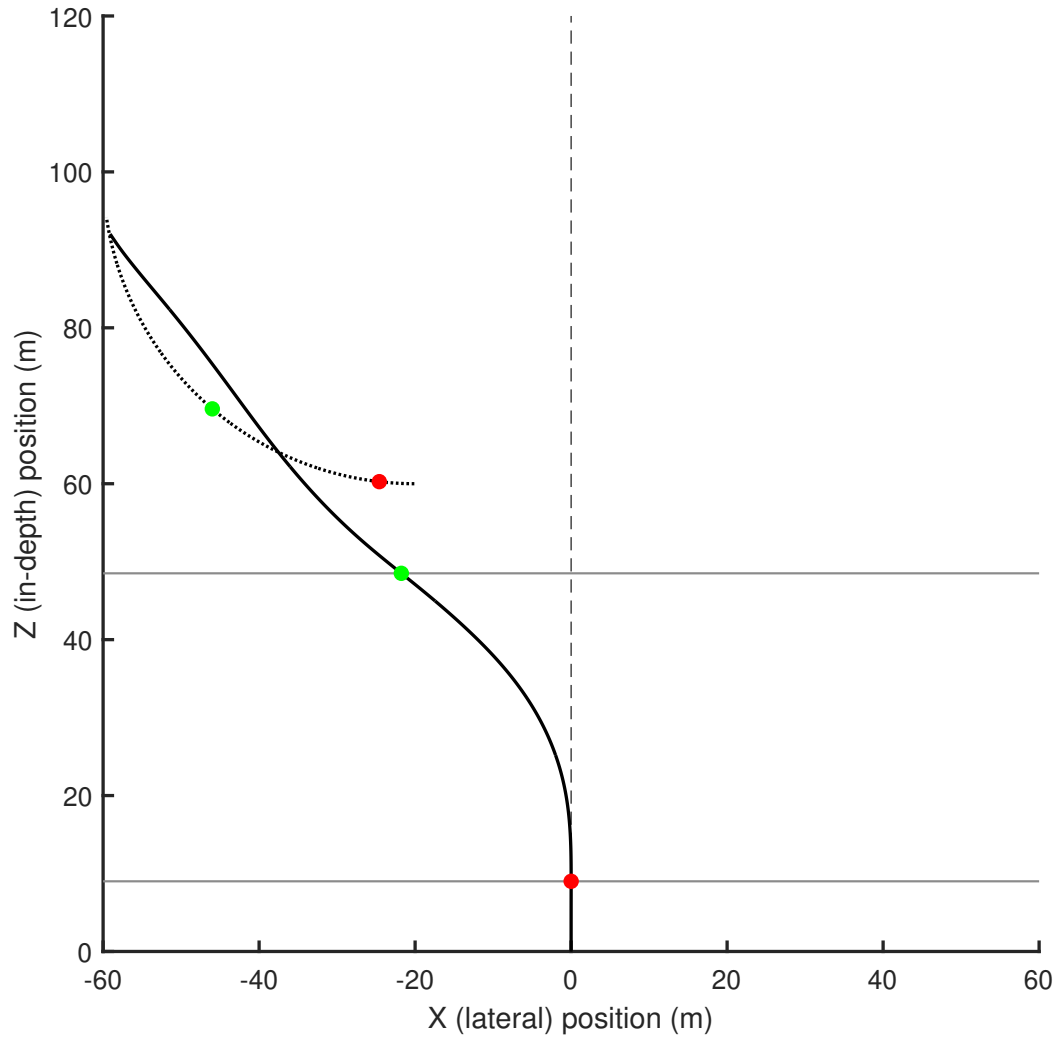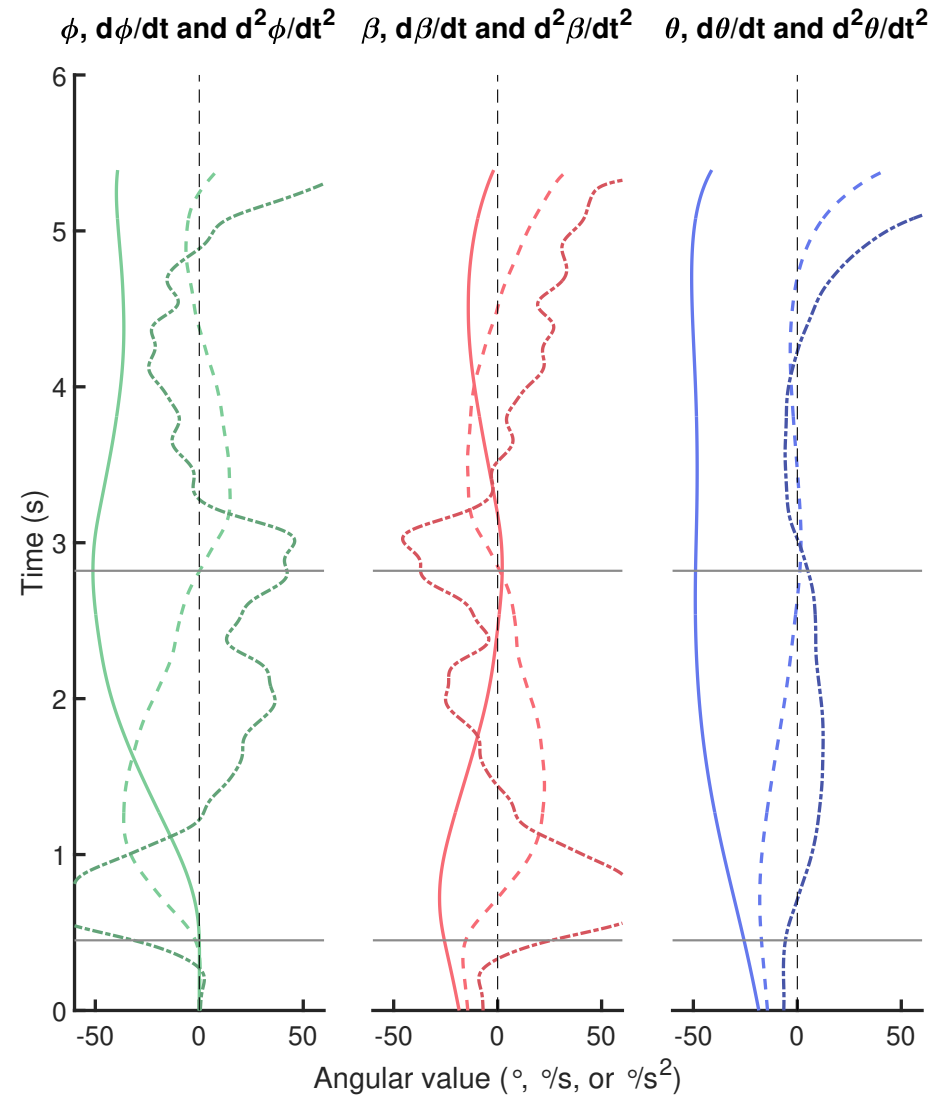

**C**

Target and participant paths

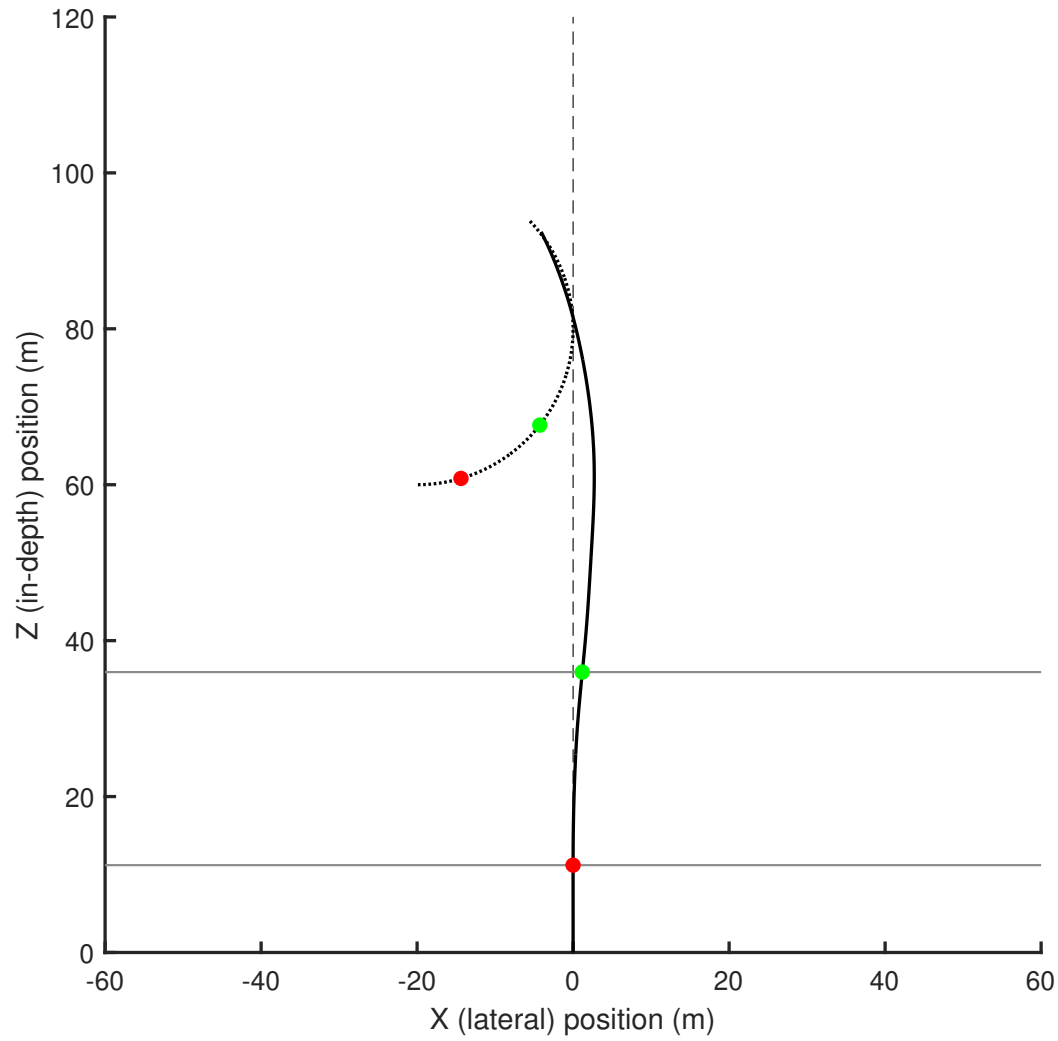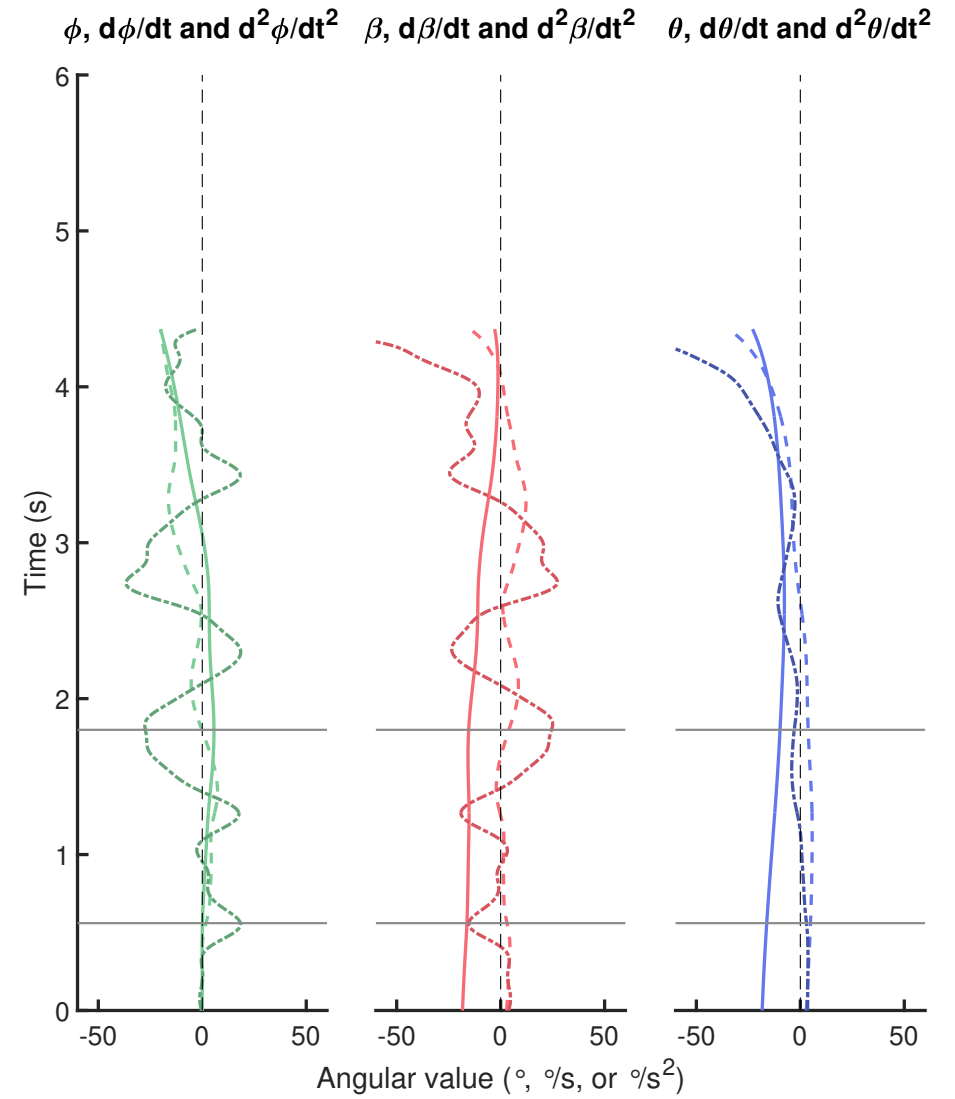

**d**

Target and participant paths

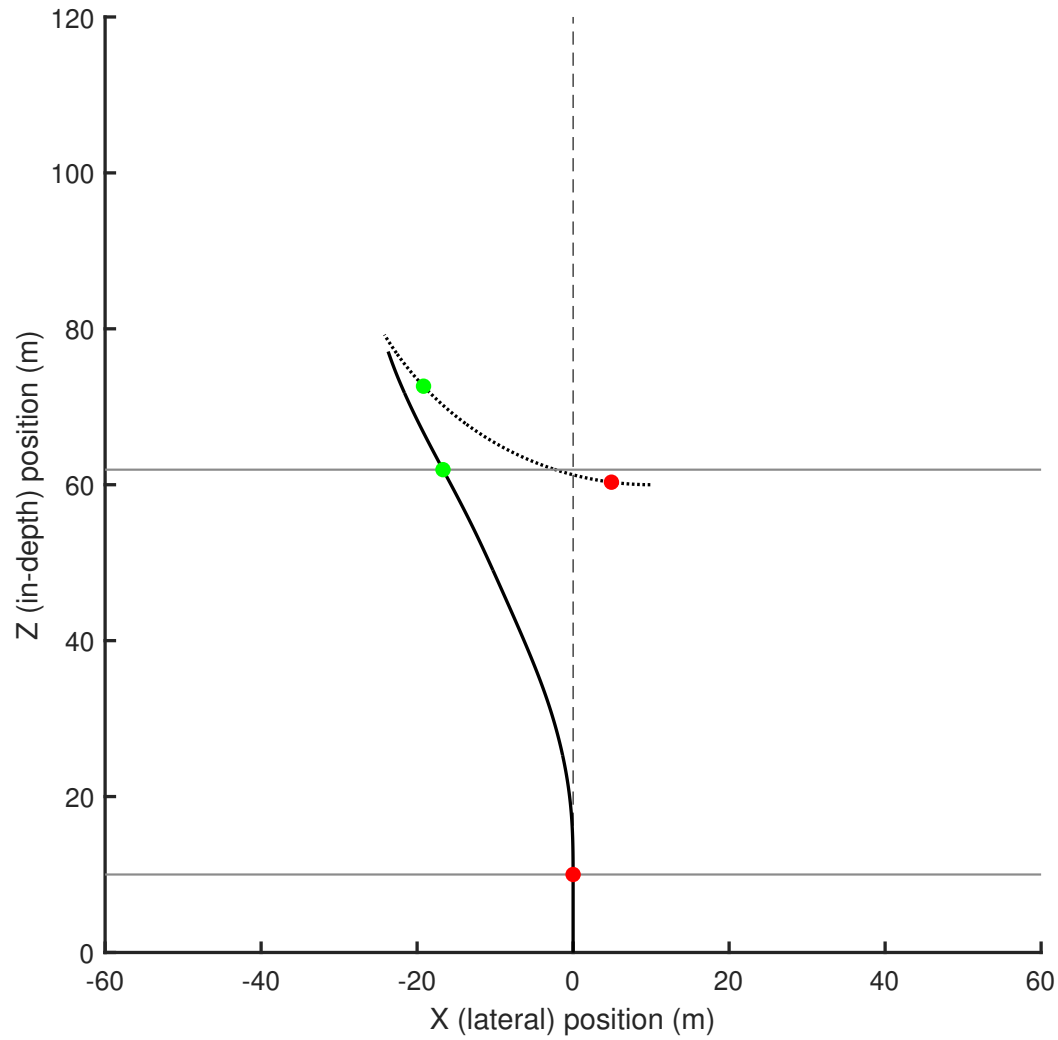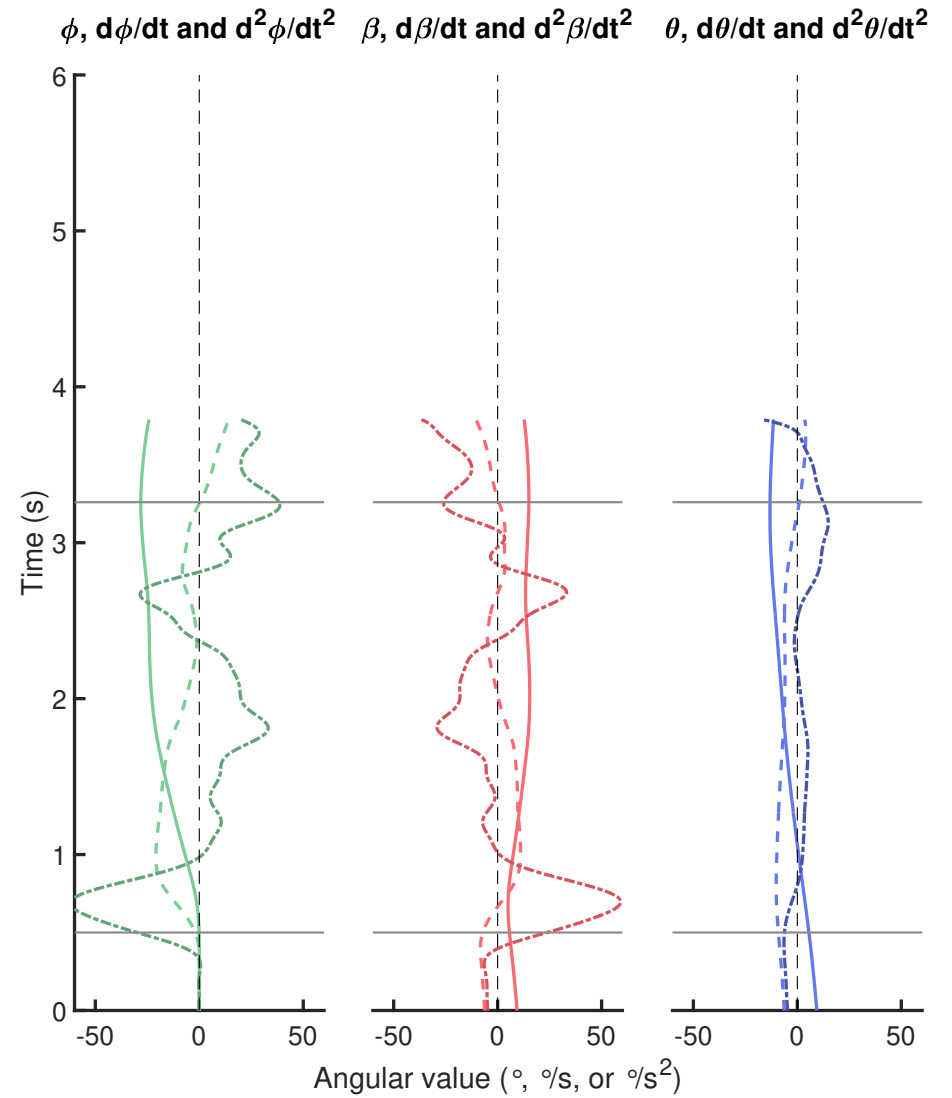

Supplement: Supplementary file [file 507a8c3b1ae3e9aa9309c057.pdf]
