# Supplementary material for: Steering to intercept targets following curving trajectories: Insights into visual guidance from Qualitative Inconsistency Detection
Source: Research Square preprint supplement (doi:10.21203/rs.3.rs-1557142/v1), 2022-09-09
Supplement: Supplementary file 1 [file b9f972bef5dbad83d53fc4b4.pdf]

# Steering to intercept targets following curving trajectories: Insights into visual guidance from Qualitative Inconsistency Detection

Daphne van Opstal, Remy Casanova, Frank T.J.M. Zaal, and Reinoud J. Bootsma

## *Supplementary information content:*

**Supplementary Fig. S1:** Page-size landscape-oriented enlargements of the four individual panels of Fig. 3 presented in the main text, with Fig.S1a representing the S20/R20-OUT (rightward) trial of Participant 10 in Block 3, Fig.S1b representing the S20/R40-OUT (leftward) trial of Participant 11 in Block 3, Fig.S1c representing the S20/R40-IN (rightward) trial of Participant 7 in Block 3, and Fig.S1d representing the S10/R40-IN (leftward) trial of Participant 12 in Block 3.

**Supplementary Fig. S2-P1:** Page-size landscape-oriented QuID plots for all 120 individual trials of the Participant 1.

**Supplementary Fig. S2-P2:** Page-size landscape-oriented QuID plots for all 120 individual trials of the Participant 2.

**Supplementary Fig. S2-P3:** Page-size landscape-oriented QuID plots for all 120 individual trials of the Participant 3.

**Supplementary Fig. S2-P4:** Page-size landscape-oriented QuID plots for all 120 individual trials of the Participant 4.

**Supplementary Fig. S2-P5:** Page-size landscape-oriented QuID plots for all 120 individual trials of the Participant 5.

**Supplementary Fig. S2-P6:** Page-size landscape-oriented QuID plots for all 120 individual trials of the Participant 6.

**Supplementary Fig. S2-P7:** Page-size landscape-oriented QuID plots for all 120 individual trials of the Participant 7.

**Supplementary Fig. S2-P8:** Page-size landscape-oriented QuID plots for all 120 individual trials of the Participant 8.

**Supplementary Fig. S2-P9:** Page-size landscape-oriented QuID plots for all 120 individual trials of the Participant 9.

**Supplementary Fig. S2-P10:** Page-size landscape-oriented QuID plots for all 120 individual trials of the Participant 10.

**Supplementary Fig. S2-P11:** Page-size landscape-oriented QuID plots for all 120 individual trials of the Participant 11.

**Supplementary Fig. S2-P12:** Page-size landscape-oriented QuID plots for all 120 individual trials of the Participant 12.

**Supplementary Fig. S2-P13:** Page-size landscape-oriented QuID plots for all 120 individual trials of the Participant 13.

**Supplementary Fig. S2-P14:** Page-size landscape-oriented QuID plots for all 120 individual trials of the Participant 14.
